# Supplementary material for: Plasmodium falciparum parasite population structure and gene flow associated to anti-malarial drugs resistance in Cambodia
Source: Malar J. 2016 Jun 14;15:319. doi: 10.1186/s12936-016-1370-y (PMC4908689; doi:10.1186/s12936-016-1370-y)
Supplement: Supplementary file 4 — 10.1186/s12936-016-1370-y Primer sequences for LDR (Ligation Detection reaction) performed. [file 12936_2016_1370_MOESM4_ESM.xlsx]

## Sheet: Additional file 4
ID	Barcode	Allele	Microsphere ID	LDR PRIMER		Conserved Primer
				Part 1	Part 2
Assay#1	NA	REF	MTAG-A022	CAAACAAACATTCAAATATCAATC	GATAAAAATGTAGGTGATGTAAAAGATG	[Phos]CATATAATGAAGAAAATTTATTAGGAAAGA[BtnTg]
		ALT	MTAG-A025	CTTTCTTAATACATTACAACATAC	GATAAAAATGTAGGTGATGTAAAAGATA
Assay#2	NA	REF	MTAG-A026	TACATTCAACACTCTTAAATCAAA	GCTTTCCTATCAACCGTTTCC	[Phos]TTAGCCTTCACAGTTGTAATGTTATCT[BtnTg]
		ALT	MTAG-A027	TAACTTACACTTAACTATCATCTT	GCTTTCCTATCAACCGTTTCT
Assay#3	BC01	REF	MTAG-A028	CACTTAATTCATTCTAAATCTATC	TTTCAAATGTTATTTTCAACTATGTTAAGTAAC	[Phos]GATGCAAATAATCTTGATAAAGTATATGG[BtnTg]
		ALT	MTAG-A029	TACTACTTCTATAACTCACTTAAA	TTTCAAATGTTATTTTCAACTATGTTAAGTAAT
Assay#4	BC02	REF	MTAG-A033	ACTACTTATTCTCAAACTCTAATA	GAAAAAAATAATTTGAACAATAAAACTTATAATAA	[Phos]CATGAACGAGTCACCAAATAATATG[BtnTg]
		ALT	MTAG-A034	ACTTATTTCTTCACTACTATATCA	GAAAAAAATAATTTGAACAATAAAACTTATAATAG
Assay#5	NA	REF	MTAG-A035	CATCTTCATATCAATTCTCTTATT	TGATGTTCATATTCACAATGATCAAC	[Phos]CACCCGAACTAAATCGCTCC[BtnTg]
		ALT	MTAG-A036	ATTAAACAACTCTTAACTACACAA	TGATGTTCATATTCACAATGATCAAG
Assay#6	NA	REF	MTAG-A038	ATTCAATACTATCTAACACTTACT	GGATGTTATTAAAAATGAAGAGAAGCATAG	[Phos]TAAGAAACATTTTAATATTTTACAGAAAAAGAGG[BtnTg]
		ALT	MTAG-A039	ACAAATATCTAACTACTATCACAA	GGATGTTATTAAAAATGAAGAGAAGCATAC
Assay#7	NA	REF	MTAG-A042	CACTACACATTTATCATAACAAAT	AAGGAGATAGTGTTGGGGGC	[Phos]ATTGCTACATGCATTATACAAAATCC[BtnTg]
		ALT	MTAG-A043	AACTTTCTCTCTCTATTCTTATTT	AAGGAGATAGTGTTGGGGGT
Assay#8	BC03	REF	MTAG-A044	TCATCACTTTCTTTACTTTACATT	TGATGAAAGCCACCGAACTC	[Phos]ATATTTATGGATGAACATTATATTAATAAAGATAT[BtnTg]
		ALT	MTAG-A045	TACACAATATTCATCATAACTAAC	TGATGAAAGCCACCGAACTT
Assay#9	BC04	REF	MTAG-A012	CATAATCAATTTCAACTTTCTACT	CCATCATATAAATATTTCTATATTCCATTAGCT	[Phos]AAATTCTTAGGAAGCTTTTTTCCAAG[BtnTg]
		ALT	MTAG-A013	CAAATACATAATCTTACATTCACT	CCATCATATAAATATTTCTATATTCCATTAGCA
Assay#10	NA	REF	MTAG-A014	AATTTCTTCTCTTTCTTTCACAAT	TACGTAATGTTGTCTTAAGCCCG	[Phos]TTTAGTGATACCATACCTAATTTAAGTAGAGAAG[BtnTg]
		ALT	MTAG-A015	TACTTCTTTACTACAATTTACAAC	TACGTAATGTTGTCTTAAGCCCA
Assay#11	NA	REF	MTAG-A018	ACACTTATCTTTCAATTCAATTAC	AAATGAAAGAAGTGATGCAACAATTTGAT	[Phos]GATCGTGCCGCACAACGA[BtnTg]
		ALT	MTAG-A019	ATACTTTACAAACAAATAACACAC	AAATGAAAGAAGTGATGCAACAATTTGAC
Assay#12	BC05	REF	MTAG-A020	CTTTCTCATACTTTCAACTAATTT	AATGGAAAATTTTGATGATATTTTATTAAG	[Phos]TGAAAATGAAAAAGAATTATCTTCATATAAT[BtnTg]
		ALT	MTAG-A021	TCAAACTCTCAATTCTTACTTAAT	AATGGAAAATTTTGATGATATTTTATTAAA
Assay#13	BC06	REF	MTAG-A030	CTTAACATTTAACTTCTATAACAC	AAATAACAATGAACATCATCATGATG	[Phos]GTTCAGTTATTCCAAATAATTTTTGTAATAA[BtnTg]
		ALT	MTAG-A037	TACAACATCTCATTAACATATACA	AAATAACAATGAACATCATCATGATA
Assay#14	NA	REF	NA	NA	NA	NA
		ALT
Assay#15	BC07	REF	MTAG-A046	TTAAACAATCTACTATTCAATCAC	AAATTCAAATTATGTTCACAGGAATAAAC	[Phos]AAAATGATAAGCTTTTTCGTGATGA[BtnTg]
		ALT	MTAG-A047	TCTCTTTAAACACATTCAACAATA	AAATTCAAATTATGTTCACAGGAATAAAA
Assay#16	BC08	REF	MTAG-A048	AATCAACACACAATAACATTCATA	ACCTTCCATATCTAAAAAAACTTCATTC	[Phos]AAAATCATAGACAAAAAAAAAACAGTTTC[BtnTg]
		ALT	MTAG-A051	CAATTTACATTTCACTTTCTTATC	ACCTTCCATATCTAAAAAAACTTCATTA
Assay#17	NA	REF	NA	NA	NA	NA
		ALT
Assay#18	NA	REF	NA	NA	NA	NA
		ALT
Assay#19	BC09	REF	MTAG-A052	TTCTTCATTAACTTCTAATCTTAC	CCTACATTAAATGAAAATGAAAACGTTA	[Phos]CTCCCAAACCATCTGAAGGT[BtnTg]
		ALT	MTAG-A053	TTAACAACTTATACAAACACAAAC	CCTACATTAAATGAAAATGAAAACGTTC
Assay#20	BC10	REF	MTAG-A012	CATAATCAATTTCAACTTTCTACT	CAAAATATCAACAAGAAAAACATAATTACTC	[Phos] TTGGATGAAATTTCTTGATGAATATAA [BtnTg]
		ALT	MTAG-A013	CAAATACATAATCTTACATTCACT	CAAAATATCAACAAGAAAAACATAATTACTT
Assay#21	NA	REF	NA	NA	NA	NA
		ALT
Assay#22	NA	REF	MTAG-A014	AATTTCTTCTCTTTCTTTCACAAT	GTAAATATTTTAGTGAAGATTATTTTTGGACT	[Phos]CAAGCTAATATAGGTCCATTGTGTATT[BtnTg]
		ALT	MTAG-A015	TACTTCTTTACTACAATTTACAAC	GTAAATATTTTAGTGAAGATTATTTTTGGACC
Assay#23	NA	REF	MTAG-A026	TACATTCAACACTCTTAAATCAAA	AACAAAATGGATGATTTCGTATATACA	[Phos]TGCTGGAGGAGTTGTTTGTT[BtnTg]
		ALT	MTAG-A027	TAACTTACACTTAACTATCATCTT	AACAAAATGGATGATTTCGTATATACC
Assay#24	BC11	REF	MTAG-A028	CACTTAATTCATTCTAAATCTATC	AATTAGAAAATACACAAAATTATCAAAAAAG	[Phos] AATTGAAAATTTAAAAAATGTTATTGTTTC [BtnTg]
		ALT	MTAG-A078	TTTACAAATCTAATCACACTATAC	AATTAGAAAATACACAAAATTATCAAAAAAT
